# Supplementary material for: Mid-Regional Pro-Adrenomedullin as a Prognostic Factor for Severe COVID-19 ARDS
Source: MDPI journal article supplement (doi:10.3390/antibiotics11091166), 2022-08-29
Supplement: s1 [file s1]

## Supplementary material

### Mid-regional Pro-adrenomedullin as a prognostic factor for severe COVID-19 ARDS

Etienne de Montmollin, Katell Peoc'h, Mehdi Marzouk, Stéphane Ruckly, Paul-Henri Wicky,

Juliette Patrier, Pierre Jacquet, Romain Sonnevile, Lila Bouadma, Jean-François Timsit

**Figure S1.** Study flowchart.

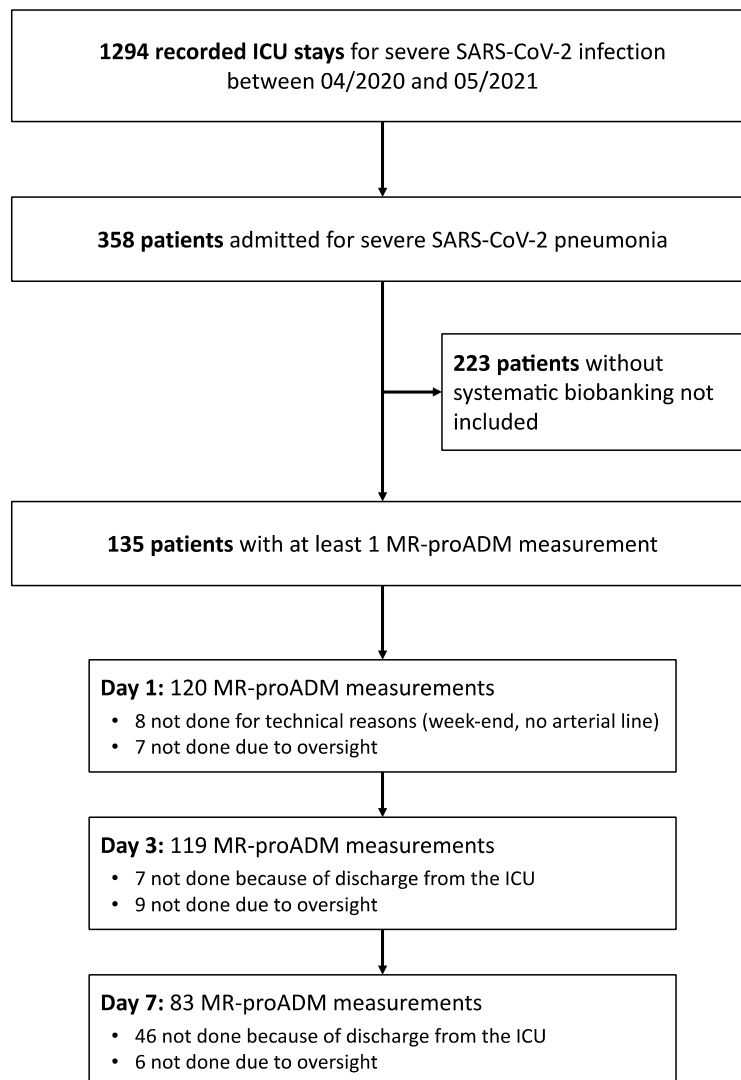

**Table S1.** Landmark analysis of the association of day-3 and day-7 MR-proADM with day-60 mortality, according to day-1 MR-proADM.

|                                         | HR   | 95% CI      | p     |
|-----------------------------------------|------|-------------|-------|
| <b>Landmark at day 1 (n = 135)</b>      |      |             |       |
| Day-1 MR-proADM                         | 1.16 | (1.07–1.26) | <.001 |
| <b>Landmark at day 3 (n = 135)</b>      |      |             |       |
| Day-1 MR-proADM                         | 1.09 | (0.98–1.21) | 0.102 |
| MR-proADM delta between day 3 and day 1 | 1.20 | (1.01–1.43) | 0.039 |
| <b>Landmark at day 7 (n = 128)</b>      |      |             |       |
| Day-1 MR-proADM                         | 1.21 | (1.10–1.33) | <.001 |
| MR-proADM delta between day 7 and day 1 | 1.26 | (0.90–1.76) | 0.163 |

Missing data imputed by multiple imputation. Hazard ratios computed per one unit. Abbreviations: HR, Hazard Ratio; CI, Confidence Interval; MR-proADM, Mid-regional proadrenomedullin.

**Figure S2.** Survival curves according to a cut-point of 1 nmol/L of MR-proADM, on days 3 and 7.

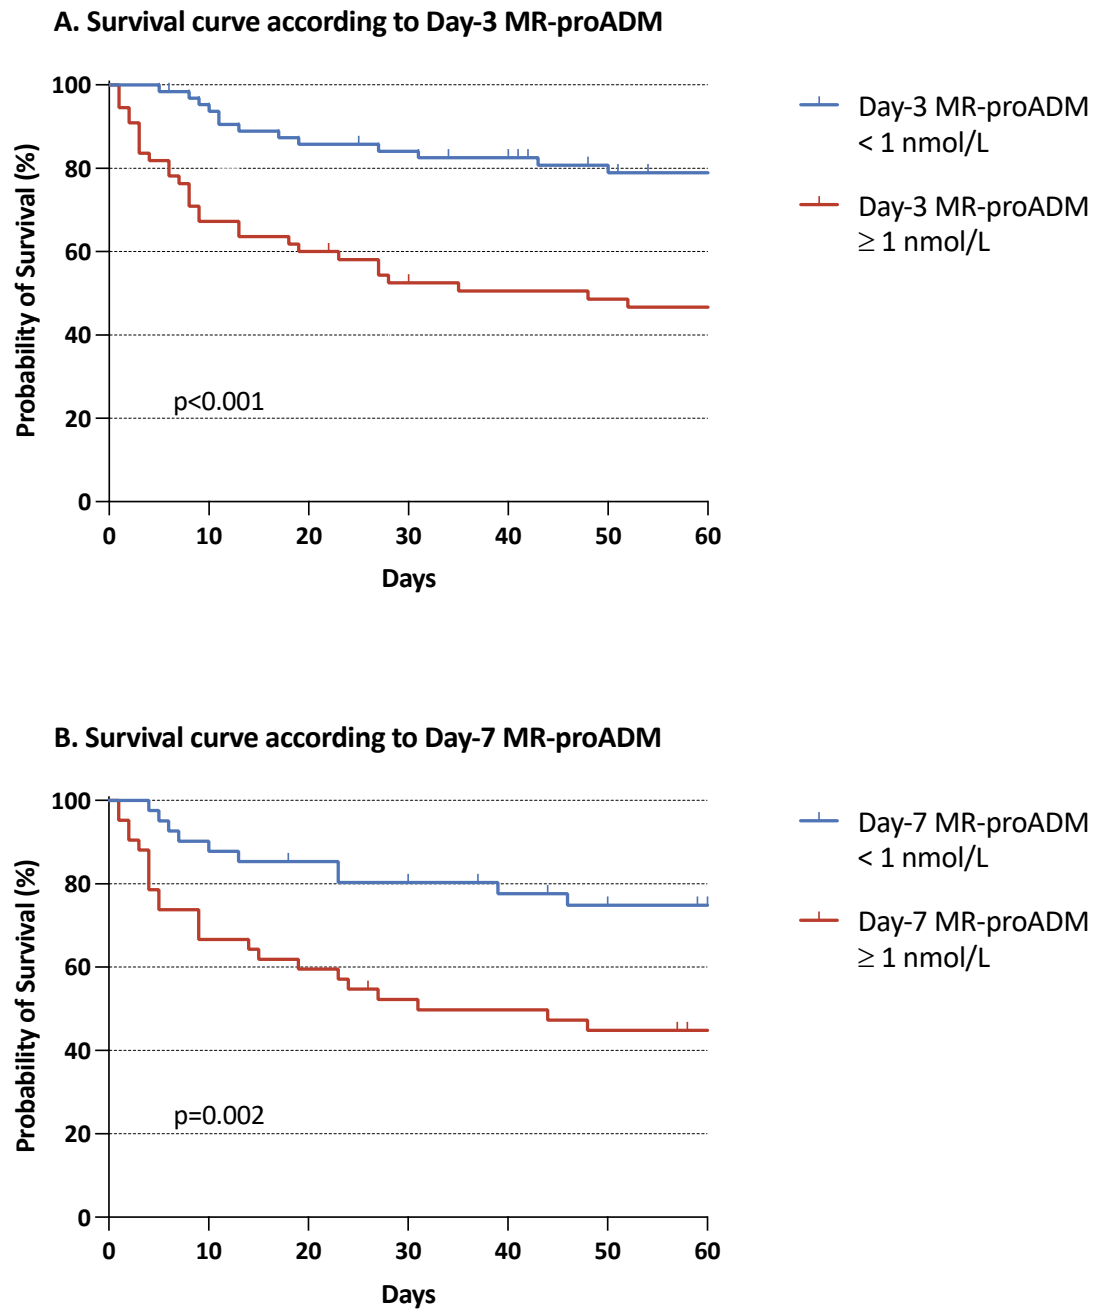

Abbreviations: MR-proADM, Mid-regional proadrenomedullin  
p computed by the log-rank test.
